# Supplementary material for: Lanthanide(iii) complexes of a pyridine N-oxide analogue of DOTA: exclusive M isomer formation induced by a six-membered chelate ring
Source: Royal Society of Chemistry journal article supplement (doi:10.1039/b409996f), 2004-01-01
Supplement: b409996f.pdf [file b409996f.pdf]

Supplementary materials for:

**Lanthanide(III) complexes of a pyridine *N*-oxide analogue of DOTA: exclusive *M* isomer formation induced by six-membered chelate ring**

**Miloslav Polášek<sup>a</sup>, Jakub Rudovský<sup>a</sup>, Petr Hermann<sup>\*a</sup>, Ivan Lukeš<sup>a</sup>, Luce Vander Elst<sup>b</sup>, Robert N. Muller<sup>b</sup>**

<sup>a</sup>Department of Inorganic Chemistry, Universita Karlova, Hlavova 2030, 128 40 Prague 2, Czech Republic. E-mail : [petrh@natur.cuni.cz](mailto:petrh@natur.cuni.cz); Fax: +420-221951253; Tel: +420-221951263

<sup>b</sup>NMR Laboratory, Department of Organic Chemistry, University of Mons-Hainaut, Avenue du champ de Mars 24, B-7000 Mons, Belgium

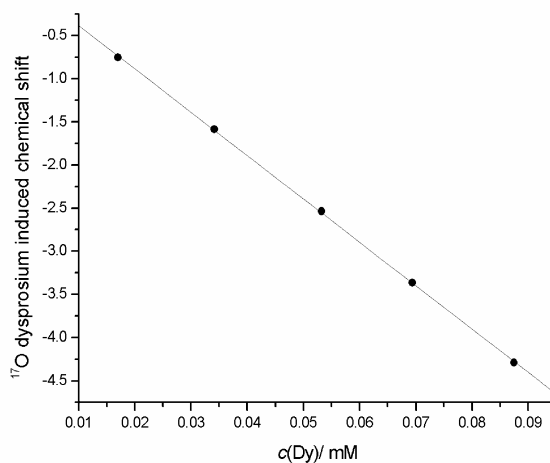

**Figure S1.** Induced  $^{17}\text{O}$  chemical shift of water in presence of  $[\text{Dy}(\text{do3a-pyNox})(\text{H}_2\text{O})]$  (pH = 7, 25 °C, 400 MHz). The slope obtained from least-square was found to be  $-50$ .

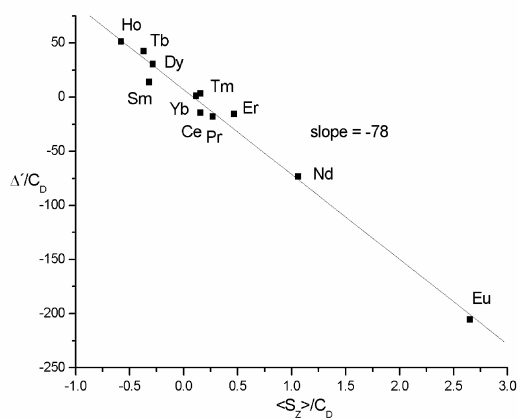

**Figure S2A.** Water  $^{17}\text{O}$  chemical shifts in presence of  $[\text{Ln}(\text{do3a-pyNox})(\text{H}_2\text{O})]$  (pH = 7; 25 °C, 400 MHz).

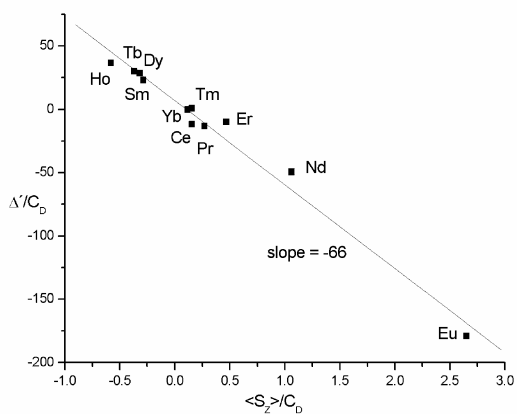

**Figure S2B.** Water  $^{17}\text{O}$  chemical shifts in presence of  $[\text{Ln}(\text{do3a-pyNox})(\text{H}_2\text{O})]$  (pH = 7; 70 °C, 400 MHz).

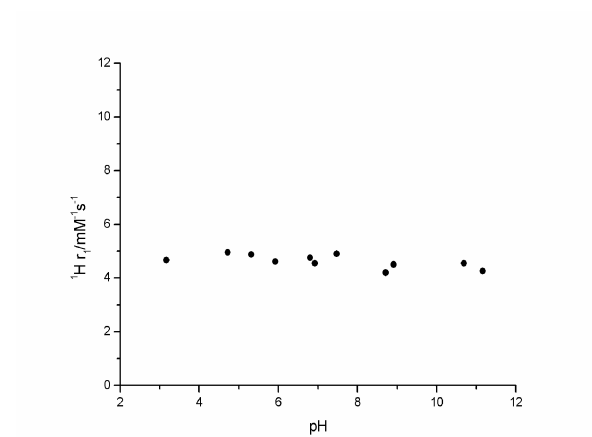

**Figure S3.** pH dependence of water proton relaxivity in presence of  $[\text{Gd}(\text{do3a-pyNox})(\text{H}_2\text{O})]$  complex.

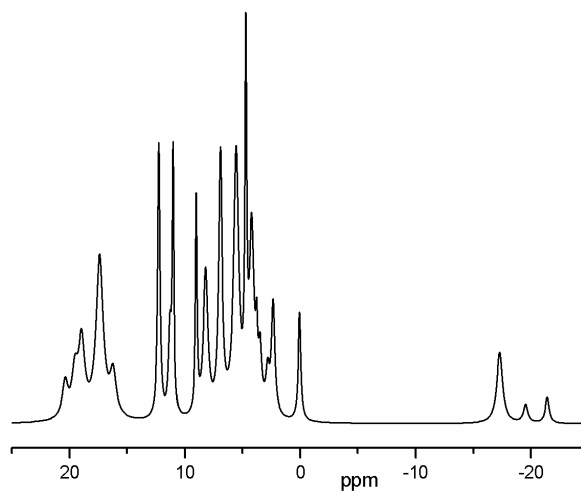

**Figure S4A.**  $^1\text{H}$  NMR spectrum of  $[\text{Nd}(\text{do3a-pyNox})(\text{H}_2\text{O})]$  ( $\text{CD}_3\text{OD}/\text{D}_2\text{O}$  4/1; 25 °C, 400 MHz).

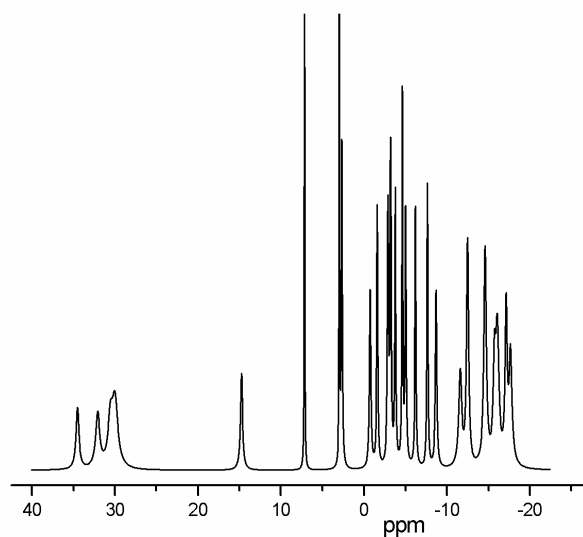

**Figure S4B.**  $^1\text{H}$  NMR spectrum of  $[\text{Eu}(\text{do3a-pyNox})(\text{H}_2\text{O})]$  ( $\text{CD}_3\text{OD}/\text{D}_2\text{O}$  4/1; 25 °C, 400 MHz).

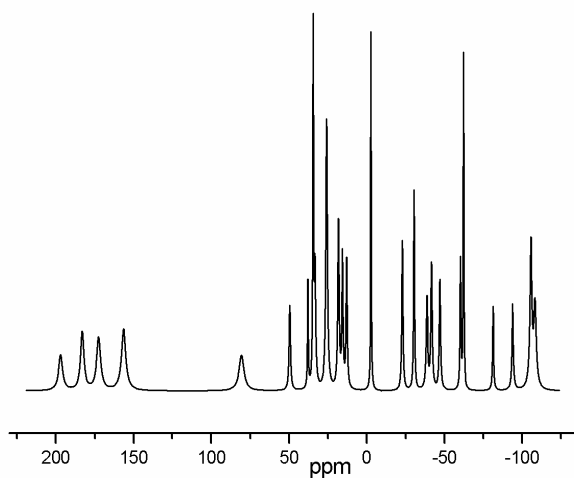

**Figure S4C.**  $^1\text{H}$  NMR spectrum of  $[\text{Yb}(\text{do3a-pyNox})(\text{H}_2\text{O})]$  ( $\text{CD}_3\text{OD}/\text{D}_2\text{O}$  4/1; -25 °C, 400 MHz).

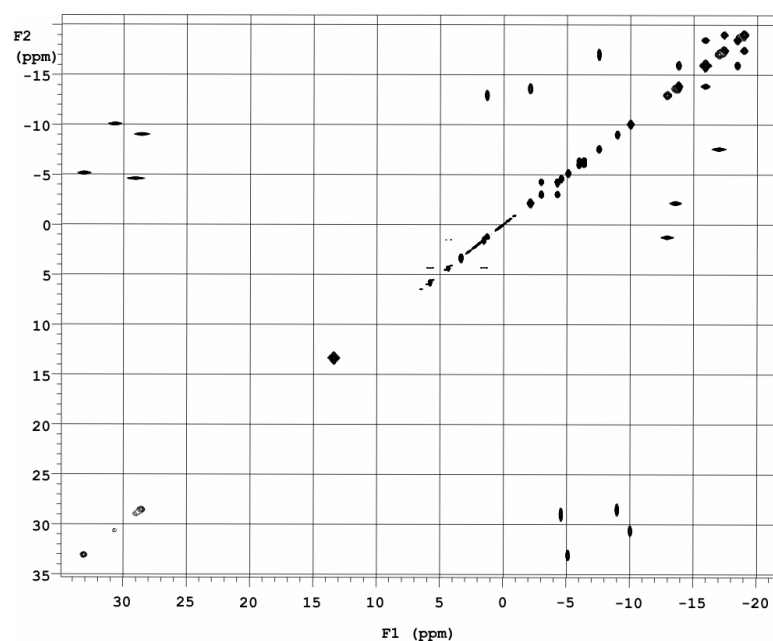

**Figure S5.**  $^1\text{H}$  EXSY spectrum of  $[\text{Eu}(\text{do3a-pyNox})(\text{H}_2\text{O})]$  ( $\text{CD}_3\text{OD}/\text{D}_2\text{O}$  4/1; 25 °C, 400 MHz). The FID was accumulated 4 h with mixing time  $t_{\text{mix}} = 20$  ms.

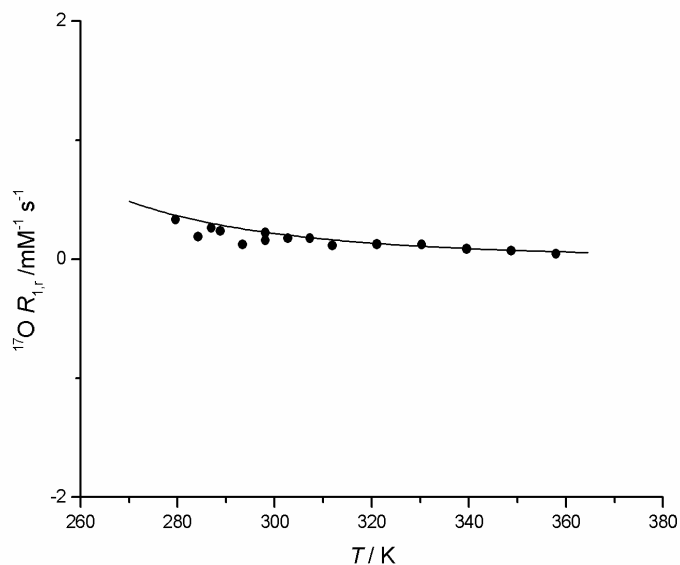

**Figure S6A.** Variable-temperature water  $^{17}\text{O}$   $R_{1r}$  relaxation rates measured in presence of  $[\text{Gd}(\text{do3a-pyNox})(\text{H}_2\text{O})]$  (pH = 7, 400 MHz). The curve represents the best result of simultaneous fitting according to BMS equation.

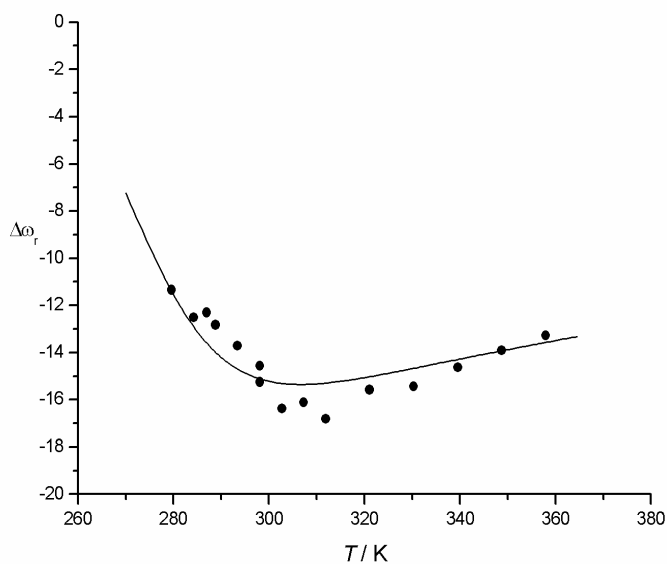

**Figure S6B.** Variable-temperature water  $^{17}\text{O}$  reduced resonance frequencies measured in presence of  $[\text{Gd}(\text{do3a-pyNox})(\text{H}_2\text{O})]$  (pH = 7, 400 MHz). The curve represents the best result of simultaneous fitting according to BMS equation.

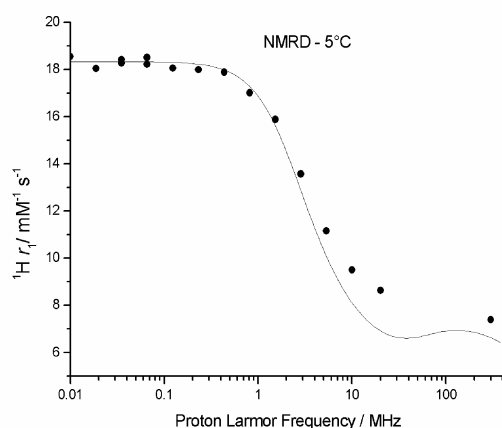

**Figure S7A.**  $^1\text{H}$  NMRD profile at pH = 7 and 5 °C. The curve represents the best result of simultaneous fitting according to BSM equations.

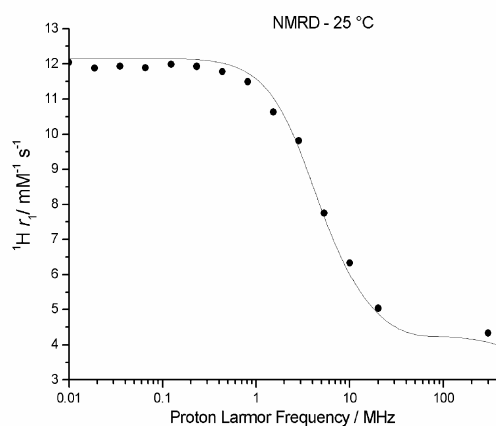

**Figure S6B.**  $^1\text{H}$  NMRD profile at pH = 7 and 25 °C. The curve represents the best result of simultaneous fitting according to BMS equations.

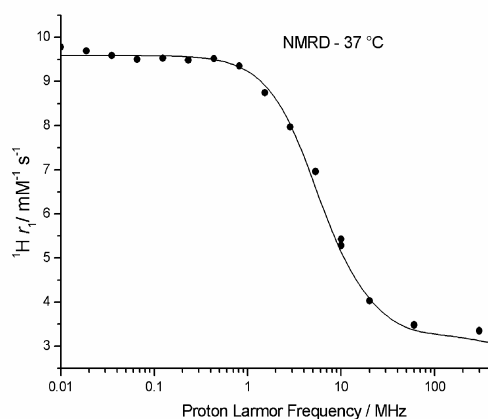

**Figure S6C.**  $^1\text{H}$  NMRD profile at pH = 7 and 37 °C. The curve represents the best result of simultaneous fitting according to BSM equations.

**Table S1.** The complete set of results obtained from simultaneous least-square fitting of data.

| Parameter                                          | [Gd(DO3A-pyNox)(H <sub>2</sub> O)] |
|----------------------------------------------------|------------------------------------|
| $r_1^{310} [\text{s}^{-1} \cdot \text{mM}^{-1}]^a$ | 4.04                               |
| $\Delta^2 [10^{20} \text{s}^{-2}]$                 | $0.69 \pm 0.03$                    |
| $\tau_M^{298} [\text{ns}]$                         | $39 \pm 1$                         |
| $\Delta H_M^\# [\text{kJ} \cdot \text{mol}^{-1}]$  | $51 \pm 2$                         |
| $\tau_R^{298} [\text{ps}]$                         | $74 \pm 3$                         |
| $\tau_v^{298} [\text{ps}]$                         | $2.7 \pm 0.1$                      |
| $A/\hbar [10^6 \text{rad} \cdot \text{s}^{-1}]$    | <u>-3.75</u>                       |
| $r_{\text{GdO}} [\text{\AA}]$                      | <u>2.5</u>                         |
| $r_{\text{GdH}} [\text{\AA}]$                      | <u>3.1</u>                         |
| $A [\text{\AA}]$                                   | <u>3.5</u>                         |
| $q$                                                | <u>1</u>                           |

<sup>a</sup> The value of millimolar relaxivity was obtained at 37 °C and 20 MHz, the value found for 25 °C and 10 MHz is  $6.31 \text{ s}^{-1} \cdot \text{mM}^{-1}$ .
